# Supplementary material for: Template synthesis, DNA binding, antimicrobial activity, Hirshfeld surface analysis, and 1D helical supramolecular structure of a novel binuclear copper(ii) Schiff base complex
Source: PubMed Central journal article supplement (PMC9069724; doi:10.1039/d2ra00719c), 2022-05-05
Supplement: RA-012-D2RA00719C-s001.pdf [file RA-012-D2RA00719C-s001.pdf]

## Supplementary Material

### Template synthesis, DNA binding, antimicrobial activity, Hirshfeld surface analysis, and 1D helical supramolecular structure of novel binuclear copper(II) Schiff base complex

Hamid Goudarziafshar<sup>1,\*</sup>, Somaieh Yousefi<sup>2</sup>, Yunes Abbasi Tyula<sup>2,\*</sup>, Michal Dušek<sup>3</sup>, Václav Eigner<sup>3</sup>

Table S1. List of abbreviations used in the manuscript with explanations.

| Abbreviation      | Meaning                                       |
|-------------------|-----------------------------------------------|
| 2D                | Two dimensional                               |
| 3D                | Three dimensional                             |
| CT-DNA            | Calf thymus DNA                               |
| Tris-HCl          | Tris(hydroxymethyl)aminomethane hydrochloride |
| CD                | Circular dichroism                            |
| HS                | Hirshfeld Surface                             |
| FP                | fingerprint plots                             |
| CIF               | Crystallographic Information File             |
| rvdW              | van der Waals radii                           |
| DMSO              | Dimethylsulfoxide                             |
| Dimethylformamide | DMF                                           |
| EtOH              | Ethanol                                       |
| NA                | Nutrient agar                                 |
| MIC               | Minimal inhibition concentration              |
| $\Delta H$        | Enthalpy changes                              |
| $\Delta S$        | Entropy changes                               |

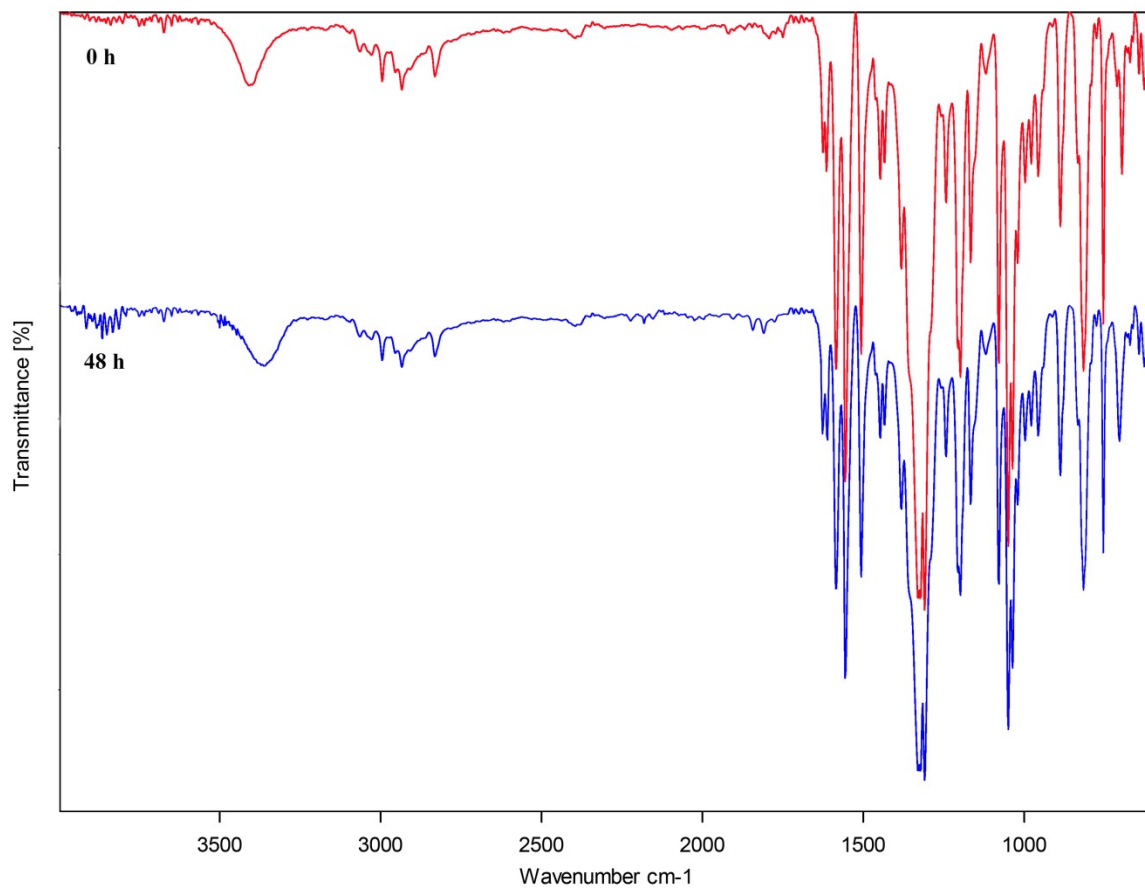

**Fig. S1.** Solution stability of 1 in DMSO over 48 h examined by FT-IR spectra

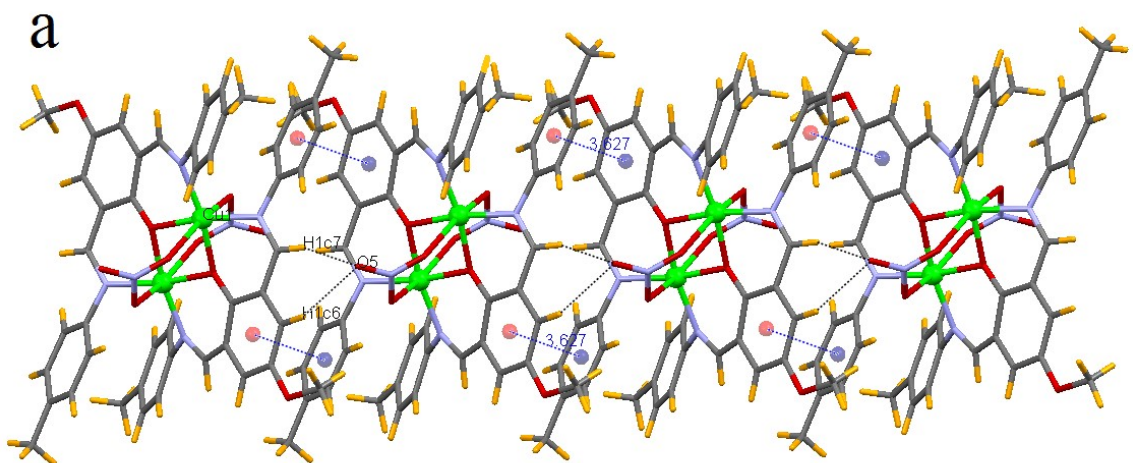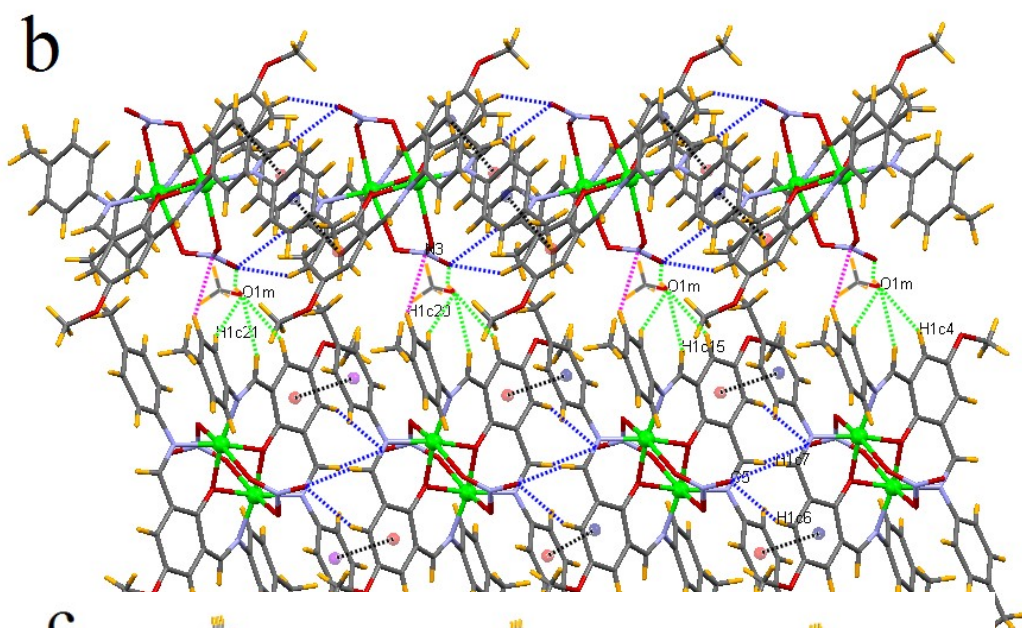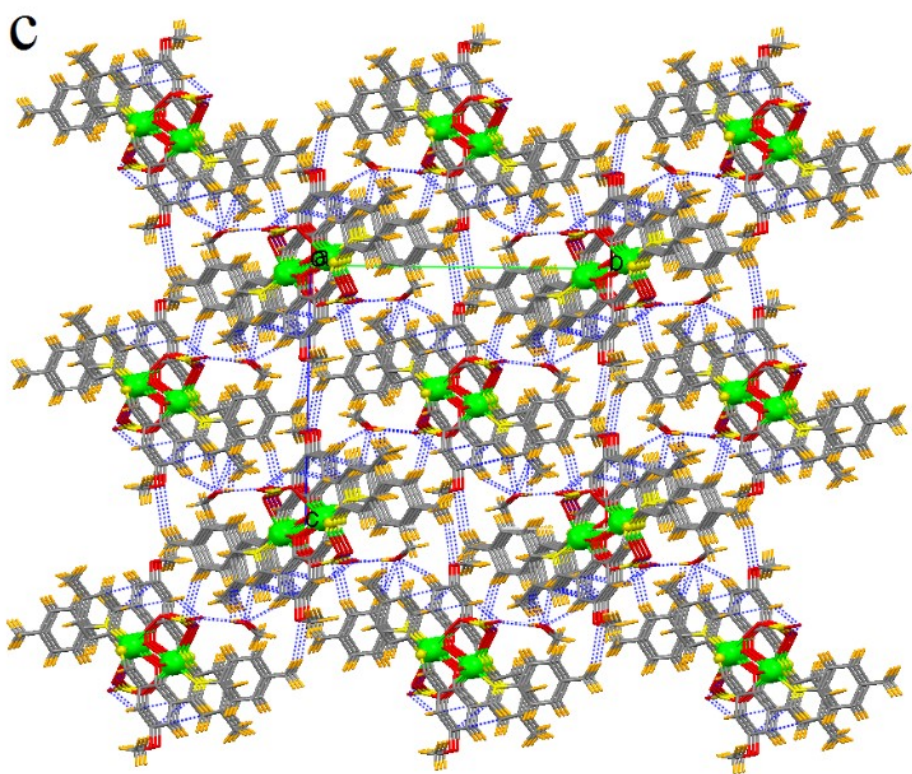

**Fig. S2.** (a) 1D supramolecular structure of **1**, (b) 2D supramolecular structure of **1**, (c) 3D supramolecular structure of **1**, showing the molecules are linked by intermolecular hydrogen bonds and  $\pi \dots \pi$  interactions which are shown as dashed lines.

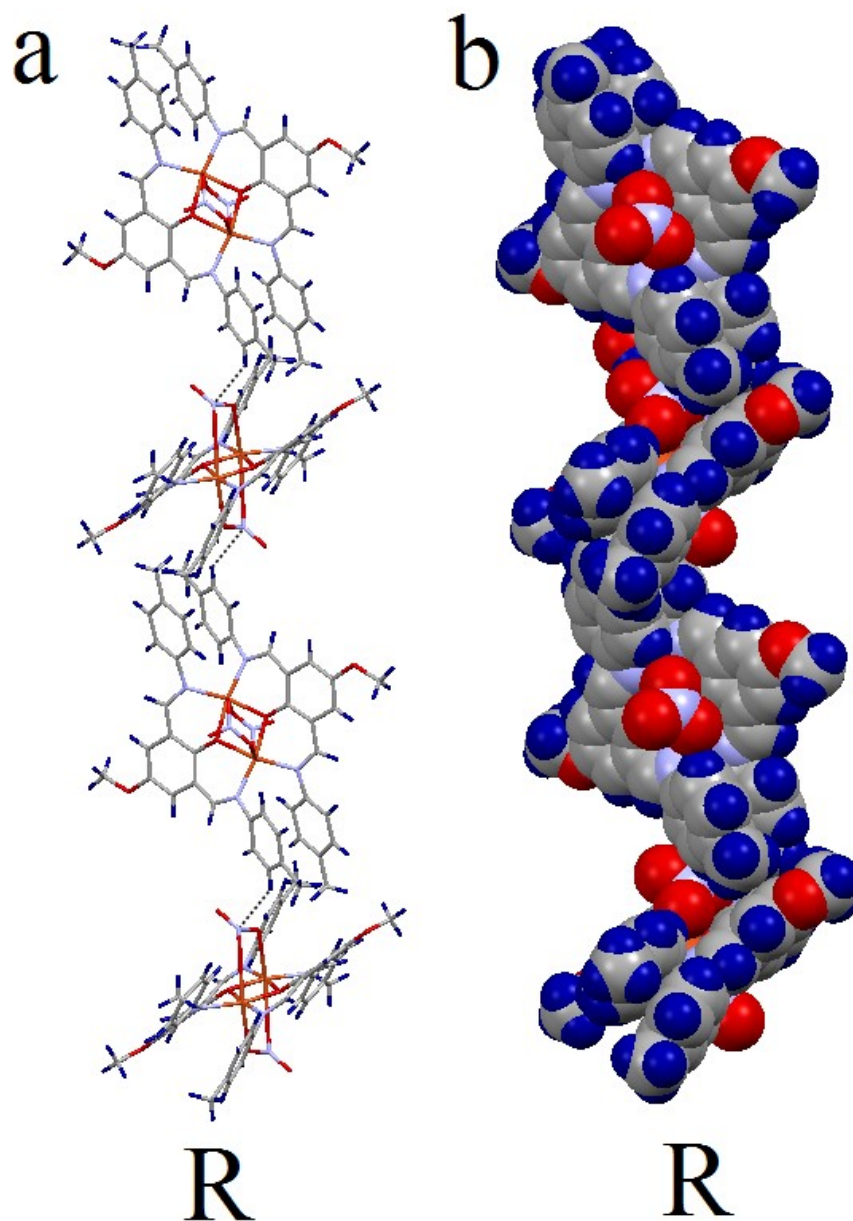

**Fig. S3.** (a) Hydrogen-bonds network. (b) Space-filling view of the 1D right-handed (R) helical chains along  $b^*$  axis.

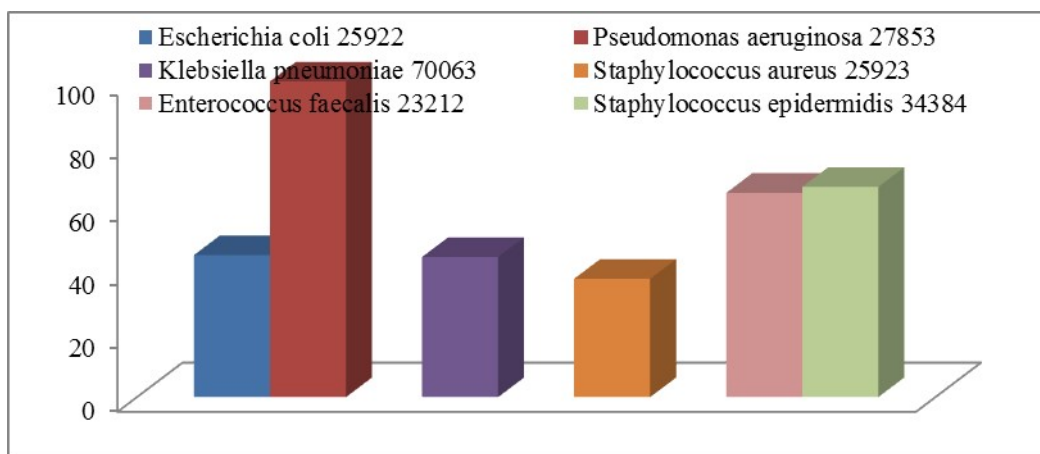

(120-200% inhibition= excellent activity, 90-100% inhibition= good activity, 75-85% inhibition= moderate activity, 50-60% inhibition= significant activity, 20-30% inhibition= negligible activity and no activity).<sup>46</sup>

**Fig. S4.** Percentage of inhibition of **1**

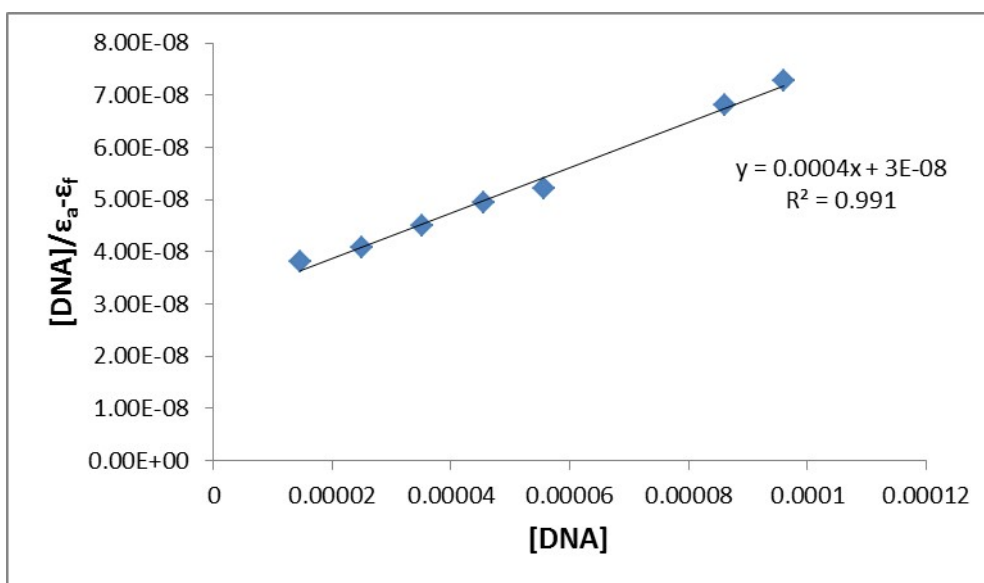

**Fig. S5.** Plot of  $[DNA]/(\epsilon_a - \epsilon_f)$  vs  $[DNA]$  for **1**.



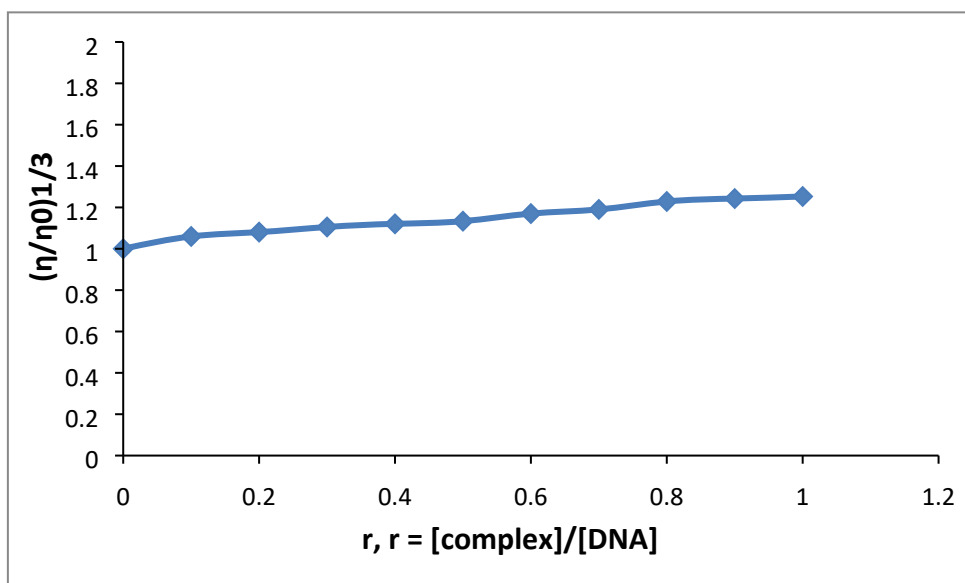

**Fig. S6.** Effect of increasing concentration of **1** on the relative viscosity of CT-DNA at 25 °C.

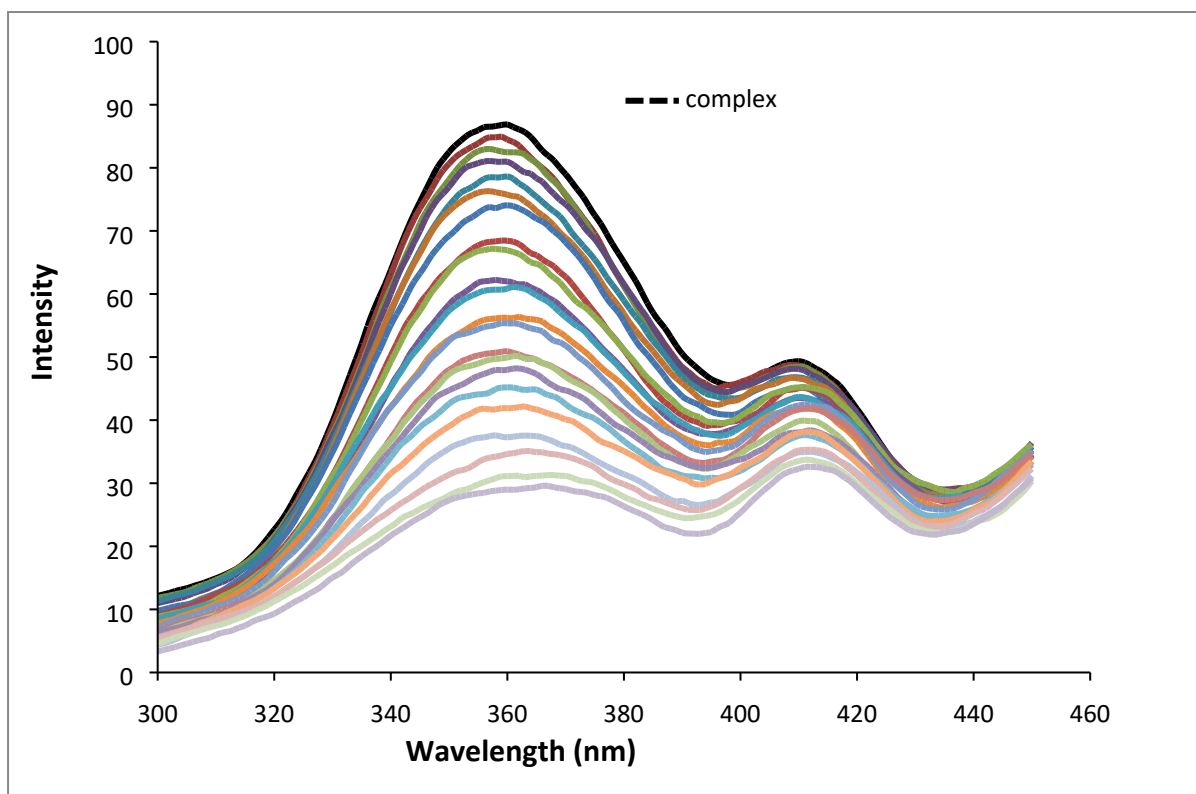

**Fig. S7.** The fluorescent spectral characteristics of the copper complex–DNA at 298 K. The complex concentration:  $2.5 \times 10^{-5}$  M at pH 7.4 Tris-buffer. DNA concentrations: 0.0 -  $5 \times 10^{-4}$  M.

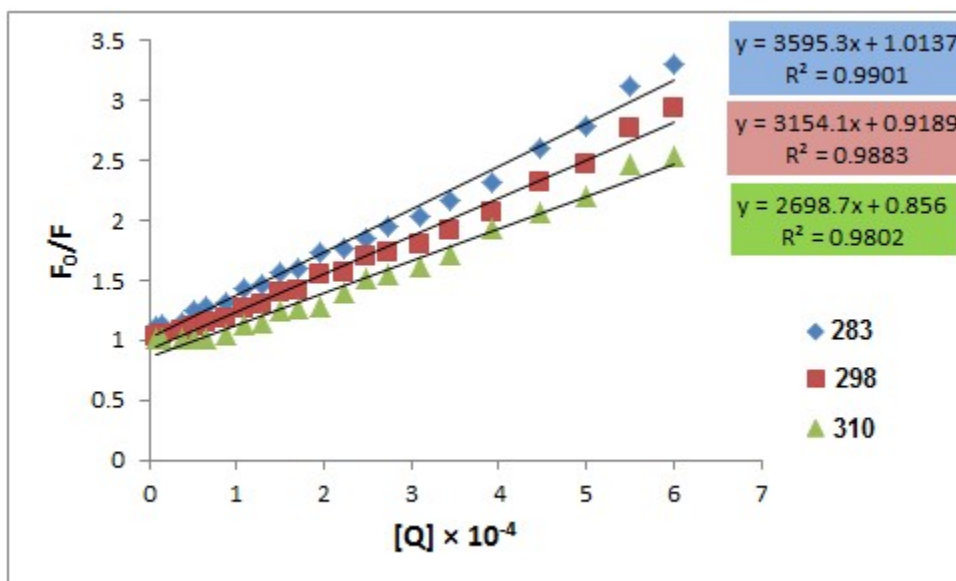

Fig. S8. The plots of  $F_0/F$  versus  $[Q]$  for calculating  $K_{sv}$  for **1**.

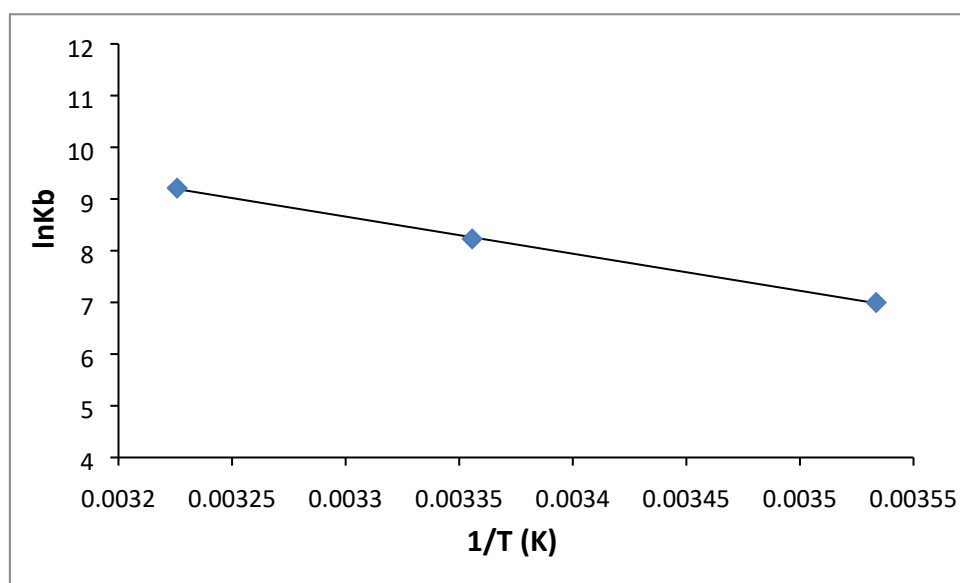

Fig. S9. The plot of  $\ln K_b$  versus  $1/T$  for **1**.
